# Supplementary material for: Development of putative probiotics as feed additives: validation in a porcine-specific gastrointestinal tract model
Source: PubMed Central journal article supplement (PMC5102953; doi:10.1007/s00253-016-7812-1), 2016-09-15
Supplement: 253_2016_7812_MOESM1_ESM.pdf [file 253_2016_7812_MOESM1_ESM.pdf]

## **Supplementary material**

### **Applied Microbiology and Biotechnology**

# **Development of putative probiotics as feed additives: validation in a porcine-specific gastrointestinal tract model**

Soyoung Yeo<sup>1</sup> · Suro Lee<sup>1</sup> · Hyunjoon Park<sup>3</sup> · Heuynkil Shin<sup>4</sup> · Wilhelm Holzapfel<sup>3</sup> · Chul

Sung Huh<sup>1,2,\*</sup>

\* Corresponding author

Tel.: +82-10-9216-9601

Fax: +82-33-339-5717

E-mail: chulsunghuh@gmail.com

<sup>1</sup> Research Institute of Eco-friendly Livestock Science, Institute of Green-Bio Science and Technology, Seoul National University, Pyeongchang, Gangwon-do 232-916, South Korea

<sup>2</sup> Graduate School of International Agricultural Technology, Seoul National University, Pyeongchang, Gangwon-do 232-916, South Korea

<sup>3</sup> Advanced Green Energy and Environment Institute (AGEE), Handong Global University, Pohang, Gyeongbuk 791-708, South Korea

<sup>4</sup> School of Life Sciences, Handong Global University, Pohang, Gyeongbuk 791-708, South Korea

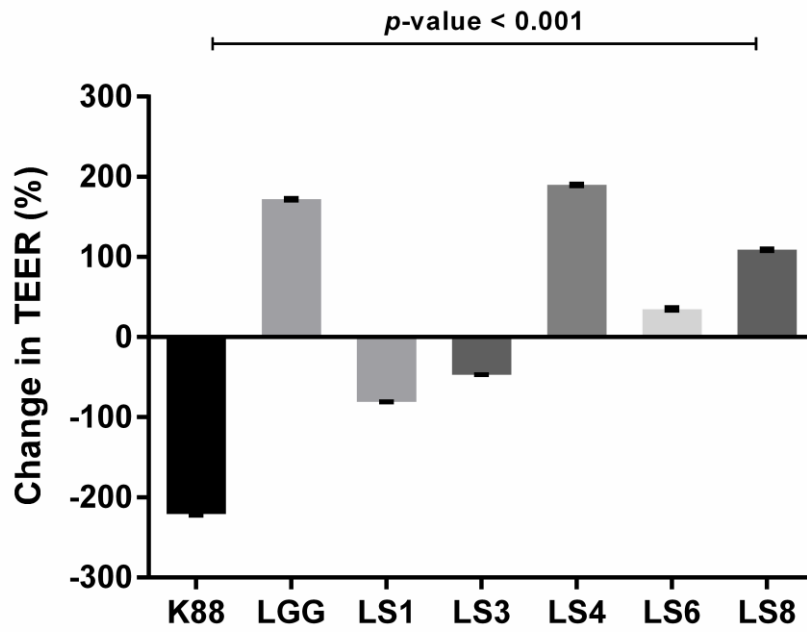

**Fig. S1** Change in TEER across confluent PSI cells after treatment with *Lactobacillus* strains or *E. coli* K88 individually. The graph represents the TEER values (% of initial value, 0 h) of PSI cells after 6 h. The data represent the means and standard errors of three replicates
